# Supplementary material for: Development and characterization of reverse genetics systems of feline infectious peritonitis virus for antiviral research
Source: Springer Nature journal article supplement (doi:10.1186/s13567-024-01373-z), 2024-09-27

A

GS-441524

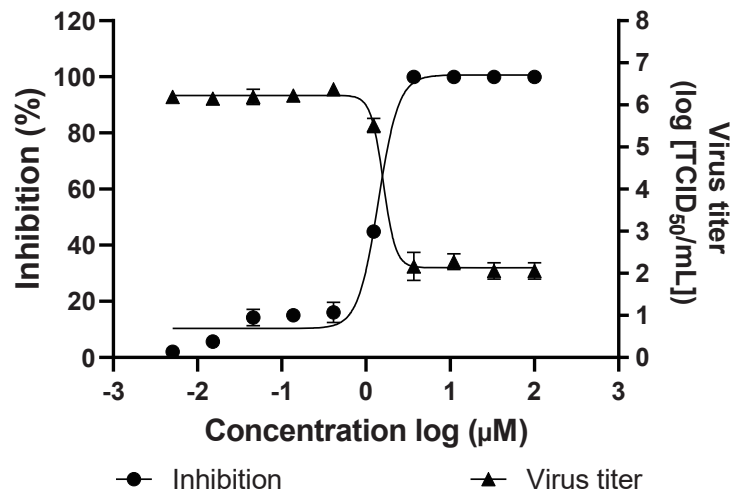

GC-376

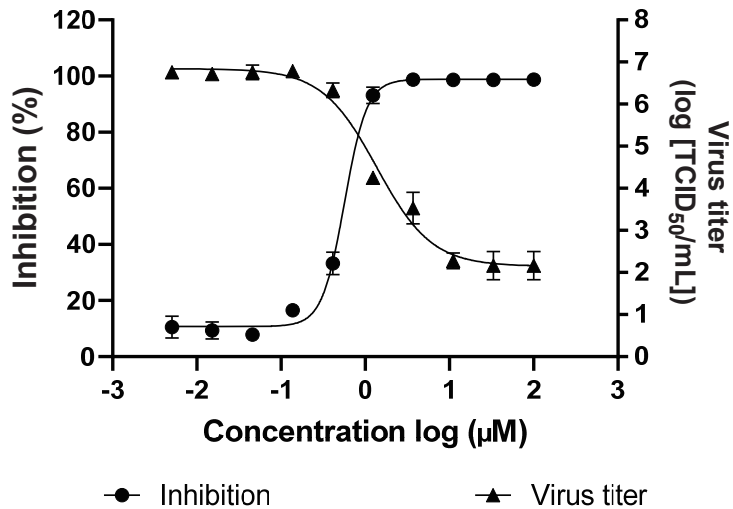

B

GS-441524

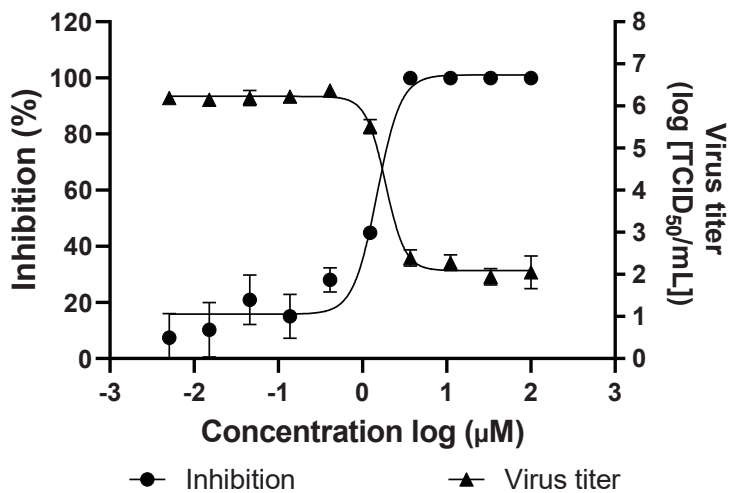

GC-376

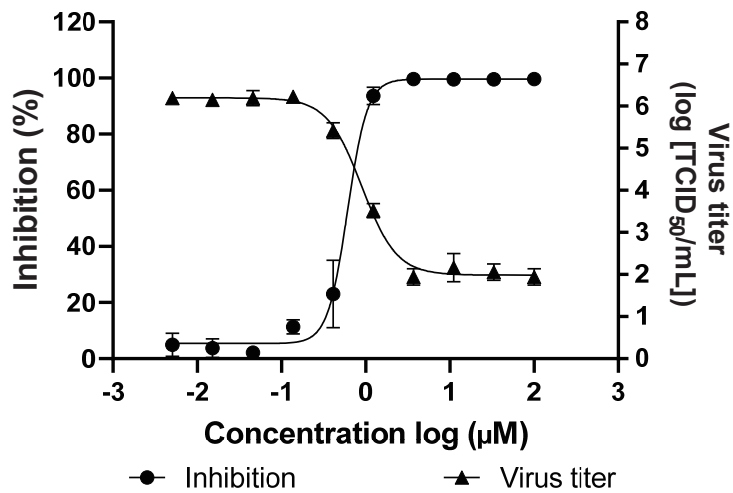

Supplement: MOESM5 [file 13567_2024_1373_MOESM5_ESM.pdf]
