# Supplementary material for: Development and characterization of reverse genetics systems of feline infectious peritonitis virus for antiviral research
Source: Springer Nature journal article supplement (doi:10.1186/s13567-024-01373-z), 2024-09-27

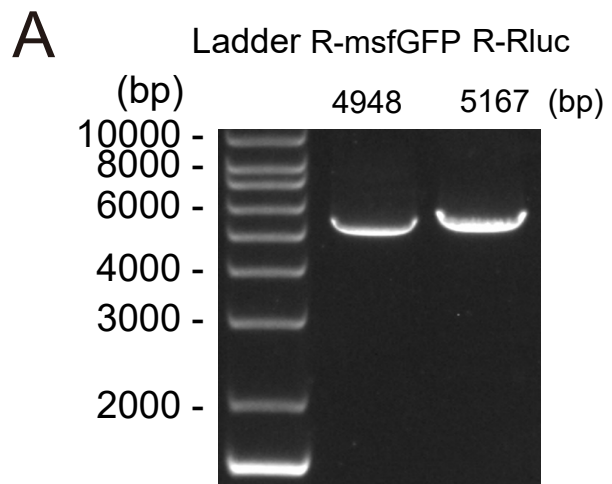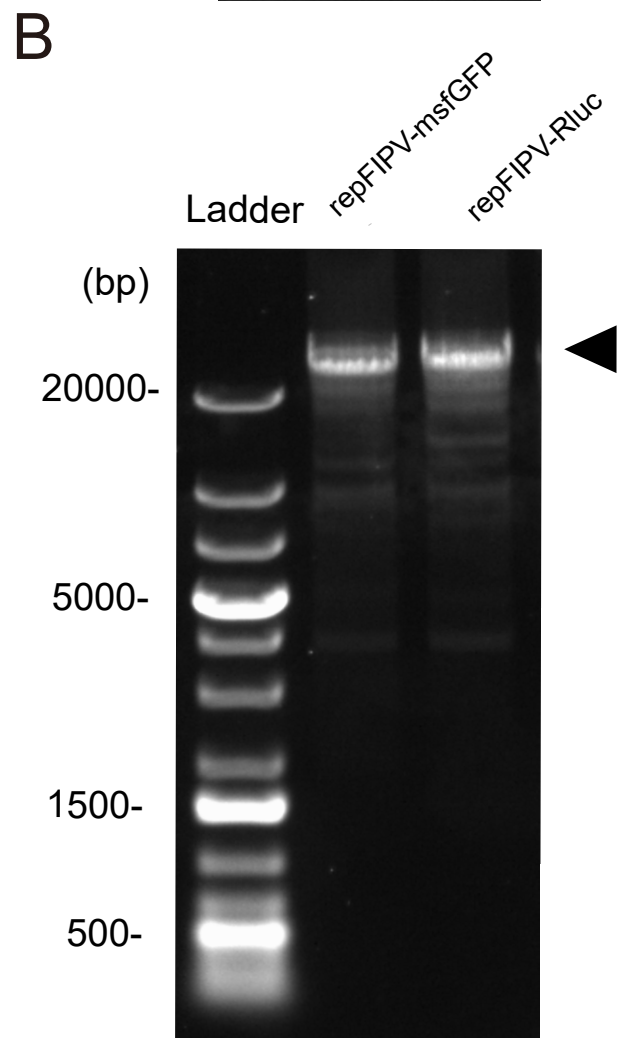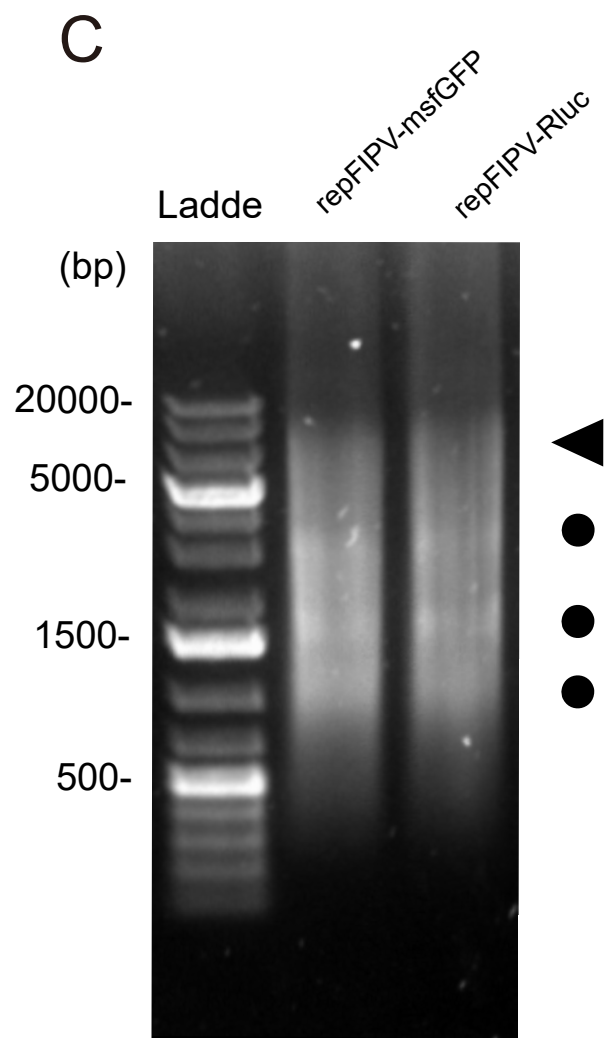

Supplement: MOESM6 [file 13567_2024_1373_MOESM6_ESM.pdf]
